# Supplementary material for: Effects of short-term grazing prohibition on soil physical and chemical properties of meadows in Southwest China
Source: PeerJ. 2021 Jun 8;9:e11598. doi: 10.7717/peerj.11598 (PMC8194418; doi:10.7717/peerj.11598)
Supplement: Supplemental Information 1 — Data analysis shows that grazing prohibition can improve plant and soil indexes of subalpine meadows and swamp meadows, and compensate for the damage of plant and soil indexes caused by overgrazing. [file peerj-09-11598-s001.xlsx]

## Sheet: Soil indexe's raw data
Time	Meadow types	Treatments	Soil depth(cm)	pH	Soil bulk density (g.cm3)	Soil total carbon (g.kg-1)	Soil organic carbon (g.kg-1)	Soil total nitrogen (g.kg-1)	Soil hydrolyzable nitrogen (mg.kg-1)	Soil total phosphorus (g.kg-1)	Soil available phosphorus (mg.kg-1)
Before	subalpine meadow	Grazing	0-10	4.54	0.8822	100.594	78.3552	6.13259	501.183	1.19563	16.2779
Before	subalpine meadow	Grazing	0-10	4.33	0.9531	89.1212	81.3455	6.46356	528.578	1.04749	18.8261
Before	subalpine meadow	Grazing	0-10	4.78	0.9229	95.3818	76.6116	6.55763	509.147	1.21082	20.0056
Before	subalpine meadow	Grazing	10-20	4.68	1.1766	60.3916	52.8689	4.58997	340.847	1.03371	15.6467
Before	subalpine meadow	Grazing	10-20	4.67	1.0504	63.0905	61.543	4.31454	356.086	1.02908	10.2364
Before	subalpine meadow	Grazing	10-20	4.3	1.124	64.1947	59.5654	4.67242	337.925	1.14739	12.4757
Before	subalpine meadow	Grazing	20-30	4.82	1.1877	35.9157	37.2259	3.57988	224.278	1.0353	5.67316
Before	subalpine meadow	Grazing	20-30	4.88	1.2798	32.6017	36.5685	2.90279	203.214	0.989866	6.39499
Before	subalpine meadow	Grazing	20-30	4.53	1.4415	41.911	34.7349	3.30813	206.237	1.1324	5.70654
Before	subalpine meadow	Grazing	30-40	5.11	1.3177	30.628	24.7372	2.3198	171.564	1.01916	3.14325
Before	subalpine meadow	Grazing	30-40	4.97	1.474	24.5426	26.7379	2.4571	153.916	0.912015	4.67316
Before	subalpine meadow	Grazing	30-40	4.38	1.2975	26.9615	24.6528	2.55206	154.121	1.10687	4.53408
Before	subalpine meadow	Grazing	40-60	5.15	1.4422	21.4367	19.2585	2.03672	125.179	0.968921	3.86509
Before	subalpine meadow	Grazing	40-60	4.975	1.6684	19.2116	18.2823	1.97758	135.603	0.853086	4.18637
Before	subalpine meadow	Grazing	40-60	4.41	1.4833	18.7775	21.6521	1.89206	115.216	1.04753	4.03408
Before	subalpine meadow	Grazing prohibition	0-10	4.57	0.8725	100.583	79.6749	6.07357	525.205	1.17222	17.9193
Before	subalpine meadow	Grazing prohibition	0-10	4.53	1.0277	93.5886	81.1912	6.38471	496.861	1.06867	18.0709
Before	subalpine meadow	Grazing prohibition	0-10	4.55	0.8468	95.2858	79.4967	6.51141	521.919	1.22203	19.1549
Before	subalpine meadow	Grazing prohibition	10-20	4.39	1.09877	65.1361	57.9053	4.55065	342.509	1.15275	13.1469
Before	subalpine meadow	Grazing prohibition	10-20	4.79	1.1617	63.4161	60.1724	4.62892	363.82	1.13075	13.4526
Before	subalpine meadow	Grazing prohibition	10-20	4.59	1.1022	59.443	55.9953	4.43083	337.182	0.975854	11.6629
Before	subalpine meadow	Grazing prohibition	20-30	4.74	1.2589	33.6865	35.7421	3.05988	216.032	1.10224	6.09847
Before	subalpine meadow	Grazing prohibition	20-30	4.57	1.3363	40.484	36.7923	3.56108	208.586	0.98907	5.81919
Before	subalpine meadow	Grazing prohibition	20-30	4.765	1.294	35.679	34.7092	3.25445	215.535	1.09401	5.83765
Before	subalpine meadow	Grazing prohibition	30-40	4.84	1.3518	25.1214	27.6959	2.46333	173.362	0.980556	3.49096
Before	subalpine meadow	Grazing prohibition	30-40	4.66	1.3937	31.4197	23.8042	2.50915	166.382	1.02664	4.52949
Before	subalpine meadow	Grazing prohibition	30-40	4.82	1.3696	26.7927	25.5329	2.44058	148.938	1.03821	4.44784
Before	subalpine meadow	Grazing prohibition	40-60	4.9	1.48889	18.5545	20.4031	2.08933	128.954	1.00664	3.86509
Before	subalpine meadow	Grazing prohibition	40-60	4.95	1.5486	19.8523	18.8844	2.01988	124.281	0.910514	4.17775
Before	subalpine meadow	Grazing prohibition	40-60	4.74	1.52849	23.4817	20.5568	1.97554	127.42	0.966065	4.00876
Before	swamp meadow	Grazing	0-10	4.64	0.874	67.603	59.0336	5.29001	454.343	1.18057	16.0584
Before	swamp meadow	Grazing	0-10	4.75	1.1547	71.9232	68.4357	5.09395	448.759	0.904103	17.3491
Before	swamp meadow	Grazing	0-10	4.65	0.8501	69.8699	64.6495	4.97633	455.003	0.878472	17.5216
Before	swamp meadow	Grazing	10-20	4.67	1.2815	23.1663	21.9259	2.55314	134.486	0.842033	12.3825
Before	swamp meadow	Grazing	10-20	4.74	1.2595	20.876	16.7266	2.26098	128.907	0.85028	13.2434
Before	swamp meadow	Grazing	10-20	4.94	1.2447	19.66	21.8647	2.12608	152.269	0.675896	13.4353
Before	swamp meadow	Grazing	20-30	4.83	1.4459	21.7649	20.8009	1.52791	83.6544	0.742262	18.8526
Before	swamp meadow	Grazing	20-30	4.85	1.5281	21.6717	14.9131	1.45054	72.3697	0.671586	15.5758
Before	swamp meadow	Grazing	20-30	5.08	1.551	20.0252	15.4505	1.24602	84.3563	0.731959	17.6439
Before	swamp meadow	Grazing	30-40	4.855	1.6563	19.3629	20.6301	1.39818	79.7435	0.693239	25.4729
Before	swamp meadow	Grazing	30-40	4.6	1.5363	22.4541	22.7695	1.37297	77.6232	0.797914	28.4771
Before	swamp meadow	Grazing	30-40	5.18	1.6287	16.655	19.7797	1.41207	80.1377	0.671588	23.8526
Before	swamp meadow	Grazing	40-60	4.91	1.6494	20.3432	19.4466	1.50393	79.8885	0.815834	37.3505
Before	swamp meadow	Grazing	40-60	4.59	1.685	16.6781	19.2039	1.98451	67.902	0.689363	43.7622
Before	swamp meadow	Grazing	40-60	5.05	1.5105	15.7173	21.4732	1.73351	73.8306	0.849607	45.146
Before	swamp meadow	Grazing prohibition	0-10	4.69	0.9367	66.0919	66.963	5.1067	478.622	1.05053	17.3848
Before	swamp meadow	Grazing prohibition	0-10	4.64	0.911	76.2785	62.517	5.09056	446.371	0.971865	16.7344
Before	swamp meadow	Grazing prohibition	0-10	4.69	0.9627	68.2387	68.2463	5.30422	454.926	0.882535	16.993
Before	swamp meadow	Grazing prohibition	10-20	4.77	1.2622	24.8486	18.8669	2.32896	140.554	0.77	13.1089
Before	swamp meadow	Grazing prohibition	10-20	4.755	1.2455	20.0941	21.6816	2.466	145.138	0.784261	13.548
Before	swamp meadow	Grazing prohibition	10-20	4.81	1.2757	19.3757	18.4997	2.18453	127.731	0.785192	12.7618
Before	swamp meadow	Grazing prohibition	20-30	4.85	1.4997	20.8953	18.4122	1.40427	90.4685	0.752046	18.0423
Before	swamp meadow	Grazing prohibition	20-30	4.91	1.53392	21.1598	15.2676	1.51021	75.2704	0.690407	16.7549
Before	swamp meadow	Grazing prohibition	20-30	5.03	1.49114	22.9649	19.5209	1.30926	78.6893	0.714642	17.3296
Before	swamp meadow	Grazing prohibition	30-40	4.82	1.6016	19.3096	19.8204	1.4405	84.4546	0.772594	26.3449
Before	swamp meadow	Grazing prohibition	30-40	4.89	1.58864	21.2423	23.7492	1.41139	77.0523	0.689984	23.4033
Before	swamp meadow	Grazing prohibition	30-40	4.91	1.6328	18.8131	19.6532	1.38663	81.4106	0.726199	27.0654
Before	swamp meadow	Grazing prohibition	40-60	5.05	1.5919	18.5406	21.2327	1.64127	72.4632	0.720601	40.3853
Before	swamp meadow	Grazing prohibition	40-60	4.76	1.6502	17.9236	17.3962	1.84093	68.3966	0.830607	46.5369
Before	swamp meadow	Grazing prohibition	40-60	4.75	1.63741	17.8787	22.4184	1.75441	73.7994	0.764308	43.5229
After	subalpine meadow	Grazing	0-10	4.475	0.982	97.3491	81.3129	6.41563	509.994	1.13592	17.9584
After	subalpine meadow	Grazing	0-10	4.58	0.9262	86.8361	80.5907	6.54488	517.493	1.13267	18.7183
After	subalpine meadow	Grazing	0-10	4.61	0.9689	92.9663	71.6789	5.97227	485.336	1.16331	17.9312
After	subalpine meadow	Grazing	10-20	4.47	1.0849	61.235	55.295	4.65815	350.216	1.06891	12.8795
After	subalpine meadow	Grazing	10-20	4.7	1.2691	64.8526	56.5912	4.54444	343.85	0.982841	11.9733
After	subalpine meadow	Grazing	10-20	4.53	1.1167	55.1936	52.1104	4.2152	325.31	1.07577	13.3107
After	subalpine meadow	Grazing	20-30	4.83	1.3115	38.2139	35.0459	3.21332	203.31	0.990865	6.22576
After	subalpine meadow	Grazing	20-30	4.69	1.3722	35.1965	33.1792	3.31518	207.051	1.07844	5.94072
After	subalpine meadow	Grazing	20-30	4.73	1.2886	37.8985	39.0975	3.16298	212.179	1.05604	5.51706
After	subalpine meadow	Grazing	30-40	4.94	1.373	25.7348	27.6506	2.40917	151.806	1.03756	3.87019
After	subalpine meadow	Grazing	30-40	4.68	1.4102	29.4622	25.0177	2.30761	147.294	0.953874	4.38698
After	subalpine meadow	Grazing	30-40	4.94	1.3071	26.1271	22.9782	2.54154	143.945	1.01971	4.0482
After	subalpine meadow	Grazing	40-60	4.966	1.4371	18.6192	17.3911	1.84835	118.016	0.931352	3.67064
After	subalpine meadow	Grazing	40-60	4.825	1.5621	21.6773	21.9092	2.09359	119.704	0.859142	4.19003
After	subalpine meadow	Grazing	40-60	4.794	1.586	18.8503	18.7613	1.96525	126.954	0.991734	3.96064
After	subalpine meadow	Grazing prohibition	0-10	4.52	0.7795	105.864	79.7717	6.72339	529.516	1.13275	18.3823
After	subalpine meadow	Grazing prohibition	0-10	4.51	0.8436	107.029	84.9077	7.3087	533.565	1.27974	17.951
After	subalpine meadow	Grazing prohibition	0-10	4.53	0.8084	110.263	89.129	6.95114	545.559	1.20879	18.951
After	subalpine meadow	Grazing prohibition	10-20	4.63	0.9693	71.663	61.2862	4.86334	370.303	1.10621	13.0809
After	subalpine meadow	Grazing prohibition	10-20	4.57	0.9731	79.8412	68.858	4.67276	365.096	1.05348	12.8809
After	subalpine meadow	Grazing prohibition	10-20	4.48	1.0199	83.8454	63.1674	4.91124	371.65	1.15126	13.1856
After	subalpine meadow	Grazing prohibition	20-30	4.69	1.3609	36.8656	36.0096	2.94057	216.459	1.14364	5.95568
After	subalpine meadow	Grazing prohibition	20-30	4.57	1.1059	41.0004	34.3784	3.49342	209.829	0.992737	5.77202
After	subalpine meadow	Grazing prohibition	20-30	4.75	1.1387	40.8836	38.025	3.5364	225.601	1.11003	6.1795
After	subalpine meadow	Grazing prohibition	30-40	4.76	1.3028	27.2576	27.2525	2.7327	182.925	0.962065	3.87812
After	subalpine meadow	Grazing prohibition	30-40	4.73	1.3086	28.2642	24.9372	2.5938	160.093	1.03965	4.24958
After	subalpine meadow	Grazing prohibition	30-40	4.78	1.0906	29.0906	26.6223	2.53898	171.164	1.0491	4.53186
After	subalpine meadow	Grazing prohibition	40-60	4.87	1.4568	23.7453	20.8357	2.26873	131.847	0.993124	3.93075
After	subalpine meadow	Grazing prohibition	40-60	4.92	1.4771	21.7027	20.1731	2.2855	115.266	0.926225	4.27446
After	subalpine meadow	Grazing prohibition	40-60	4.74	1.4559	18.6336	20.1615	1.94901	137.054	0.976637	4.02698
After	swamp meadow	Grazing	0-10	4.59	0.8234	71.0964	67.7735	5.05004	436.306	1.12172	16.4211
After	swamp meadow	Grazing	0-10	4.77	0.9923	70.4553	63.7051	5.18647	470.247	0.909665	18.0374
After	swamp meadow	Grazing	0-10	4.69	1.1001	67.3951	60.0816	4.83615	448.709	0.935524	15.8116
After	swamp meadow	Grazing	10-20	4.74	1.2542	23.7086	19.6919	2.06611	129.839	0.832113	13.2299
After	swamp meadow	Grazing	10-20	4.87	1.2629	19.3173	18.8888	2.1107	133.463	0.760204	11.9252
After	swamp meadow	Grazing	10-20	4.76	1.3503	20.3819	21.6271	1.64674	147.322	0.681631	12.8504
After	swamp meadow	Grazing	20-30	4.98	1.5252	21.296	17.3137	1.30256	80.7811	0.719183	18.5731
After	swamp meadow	Grazing	20-30	4.79	1.4901	20.8322	15.6482	1.31899	84.2682	0.647379	15.5956
After	swamp meadow	Grazing	20-30	5.014	1.5555	19.8997	17.7544	1.22256	73.3268	0.726089	17.1039
After	swamp meadow	Grazing	30-40	4.895	1.6721	17.1475	20.3987	1.37017	80.0404	0.674586	25.0762
After	swamp meadow	Grazing	30-40	4.94	1.5542	21.9805	21.2192	1.40269	73.2127	0.774439	26.9529
After	swamp meadow	Grazing	30-40	4.83	1.6295	19.2987	19.6627	1.29157	82.5516	0.670029	23.8015
After	swamp meadow	Grazing	40-60	4.96	1.5932	17.2375	20.9184	1.37002	73.5492	0.80865	35.8698
After	swamp meadow	Grazing	40-60	4.75	1.667	20.0496	17.3813	1.55384	65.5181	0.685143	40.1053
After	swamp meadow	Grazing	40-60	4.89	1.603	15.3807	21.3848	1.67259	71.7707	0.815721	44.903
After	swamp meadow	Grazing prohibition	0-10	4.49	0.9182	91.4058	73.8099	5.26127	561.862	1.26145	23.9282
After	swamp meadow	Grazing prohibition	0-10	4.62	0.8777	86.9738	69.4949	5.3409	537.192	1.28857	19.951
After	swamp meadow	Grazing prohibition	0-10	4.54	0.9106	85.2888	75.9951	5.90283	548.257	1.5088	20.876
After	swamp meadow	Grazing prohibition	10-20	4.77	1.18722	39.7446	28.9247	2.38	209.12	0.967041	15.23
After	swamp meadow	Grazing prohibition	10-20	4.7	1.2221	45.3637	27.4432	2.29212	196.392	0.88153	14.5942
After	swamp meadow	Grazing prohibition	10-20	4.72	1.26721	51.2568	30.8352	2.35875	181.261	0.830119	15.4626
After	swamp meadow	Grazing prohibition	20-30	4.82	1.48058	33.9277	25.5792	2.08038	146.753	0.853105	24.1551
After	swamp meadow	Grazing prohibition	20-30	4.89	1.51618	39.663	26.221	1.50148	134.021	0.807071	23.0914
After	swamp meadow	Grazing prohibition	20-30	4.95	1.4579	37.6772	24.9332	1.56186	137.768	0.882296	24.8476
After	swamp meadow	Grazing prohibition	30-40	4.79	1.59283	39.1321	21.9505	1.38662	117.294	0.829153	36.3352
After	swamp meadow	Grazing prohibition	30-40	4.84	1.5706	37.7294	24.4577	1.05062	109.294	0.745852	37.2853
After	swamp meadow	Grazing prohibition	30-40	4.87	1.5869	45.8782	22.3998	1.24189	124.413	0.78965	41.7452
After	swamp meadow	Grazing prohibition	40-60	4.92	1.57051	31.0598	21.8078	1.55004	94.3816	0.81646	54.5983
After	swamp meadow	Grazing prohibition	40-60	4.73	1.6126	35.398	20.3613	1.38034	89.992	0.847425	63.9474
After	swamp meadow	Grazing prohibition	40-60	4.7	1.6016	38.4971	23.5354	1.27136	112.498	0.795523	56.2465

## Sheet: Plant indexe's raw data
Time	Meadow types	Treatments	Aboveground biomass (t.ha-1)	Belowground biomass (t.ha-1)	Total biomass (t.ha-1)	Root/shoot ratio	Total meadow coverage (%)	Average height (cm)	Richness index	Shannon diversity index	Evenness index
Before	subalpine meadow	Grazing	3.2302	24.13	27.3602	7.47013	70	5	6	1.20836	0.6744
Before	subalpine meadow	Grazing	3.4855	26.03	29.5155	7.46808	68	5	6	1.09044	0.608586
Before	subalpine meadow	Grazing	3.19042	28.67	31.8604	8.98628	68	6	7	1.24166	0.638085
Before	subalpine meadow	Grazing prohibition	3.5302	27.02	30.5502	7.65396	72	6	6	1.2394	0.691723
Before	subalpine meadow	Grazing prohibition	3.4855	26.53	30.0155	7.61153	70	5	7	1.14247	0.587116
Before	subalpine meadow	Grazing prohibition	3.3542	27.62	30.9742	8.23445	68	5	6	1.25183	0.698661
Before	swamp meadow	Grazing	6.0127	13.82	19.8327	2.29847	94	10	7	0.889069	0.456891
Before	swamp meadow	Grazing	6.6116	15.84	22.4516	2.39579	92	11	6	1.07724	0.601216
Before	swamp meadow	Grazing	6.2125	14.19	20.4025	2.2841	93	9	6	0.855815	0.477639
Before	swamp meadow	Grazing prohibition	7.0225	14.32	21.3425	2.03916	93	9	6	0.877036	0.489483
Before	swamp meadow	Grazing prohibition	6.0716	15.11	21.1816	2.48864	94	11	7	1.02104	0.524709
Before	swamp meadow	Grazing prohibition	6.6458	14.45	21.0958	2.17431	94	12	6	0.879101	0.490636
After	subalpine meadow	Grazing	3.2979	38.01	41.3079	11.5255	71	5	6	1.21836	0.679981
After	subalpine meadow	Grazing	3.0979	30.14	33.2379	9.72917	67	4	5	1.19044	0.739661
After	subalpine meadow	Grazing	3.6779	31.65	35.3279	8.60545	68	5	6	1.32217	0.737915
After	subalpine meadow	Grazing prohibition	17.0379	26.22	43.2579	1.53892	86	18	7	1.3694	0.703733
After	subalpine meadow	Grazing prohibition	14.1379	28.03	42.1679	1.98261	89	15	6	1.57425	0.878604
After	subalpine meadow	Grazing prohibition	13.1779	31.71	44.8879	2.4063	88	17	7	1.62833	0.836795
After	swamp meadow	Grazing	7.9879	15.37	23.3579	1.92416	93	9	6	0.919069	0.512942
After	swamp meadow	Grazing	8.3979	14.45	22.8479	1.72067	92	10	5	0.877235	0.545057
After	swamp meadow	Grazing	9.2079	15.59	24.7979	1.69311	92	9	6	0.885815	0.494383
After	swamp meadow	Grazing prohibition	25.0179	13.32	38.3379	0.532419	97	25	7	1.5177	0.779945
After	swamp meadow	Grazing prohibition	26.5879	14.34	40.9279	0.539343	96	24	7	1.61036	0.827563
After	swamp meadow	Grazing prohibition	30.9479	12.97	43.9179	0.419091	98	22	8	1.5491	0.74496
